# Supplementary material for: Synthesis and characterisation of neodymium-based MOFs for application in carbon dioxide reduction to syngas
Source: Royal Society of Chemistry journal article supplement (doi:10.1039/d4nj01420k), 2024-01-01
Supplement: d4nj01420k1.pdf [file d4nj01420k1.pdf]

## SUPPORTING INFORMATION

### Synthesis and characterisation of neodymium based MOFs for application in carbon dioxide reduction to syngas

Linia Gedi Marazani,<sup>1</sup> Maureen Gumbo,<sup>2</sup> Lendly Moyo,<sup>1</sup> Banothile C. E. Makhubela<sup>3</sup> and Gift Mehlana\*<sup>1</sup>

<sup>1</sup>Department of Chemical Sciences, Faculty of Science and Technology, Midlands State University, Private Bag 9055 Senga Road Gweru, Zimbabwe

<sup>2</sup>Chalmers University of Technology, Department of Chemistry and Chemical Engineering, SE-412 96, Göteborg, Sweden.

<sup>3</sup>Research Centre for Synthesis and Catalysis, Department of Chemical Sciences, Faculty of Science, University of Johannesburg, Auckland Park 2006, South Africa

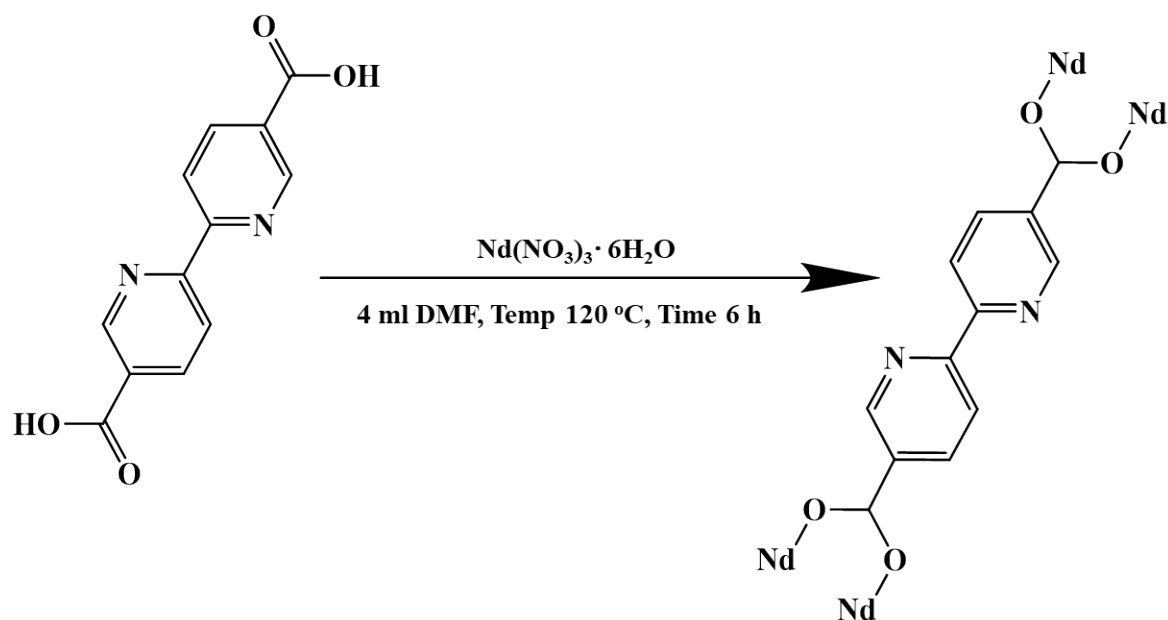

Scheme 1: Synthetic scheme for JMS-10

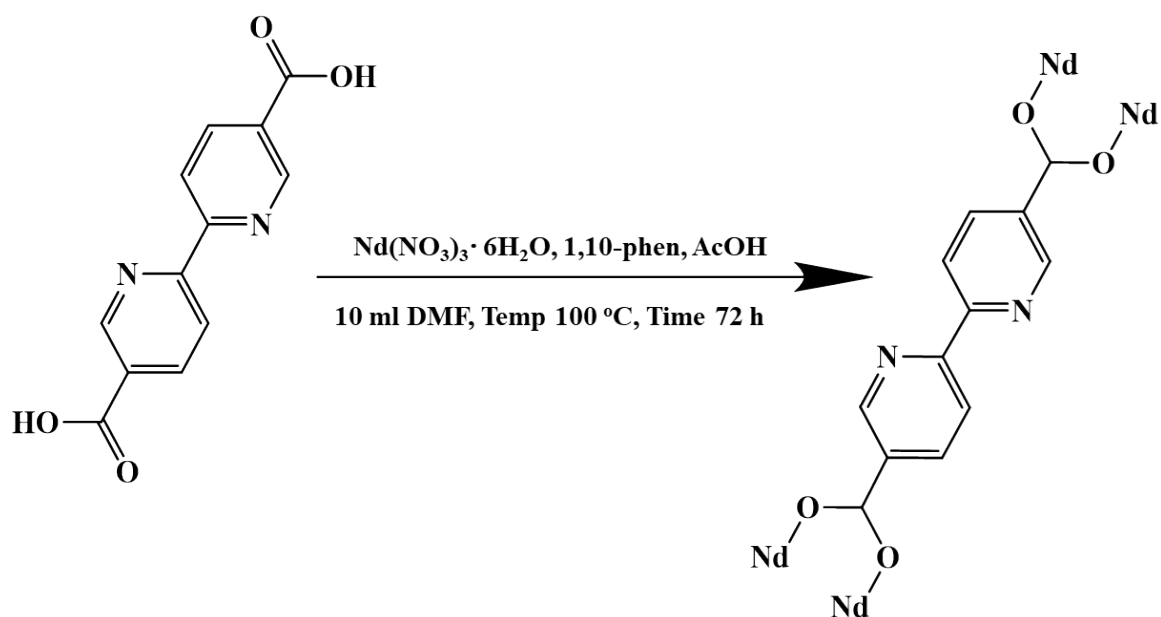

**Scheme 2:** Synthetic scheme for JMS-11

**Table S1:** Crystallographic and refinement parameters of JMS-10 and JMS-11

|                                        | JMS-10                                                         | JMS-11                                                                       |
|----------------------------------------|----------------------------------------------------------------|------------------------------------------------------------------------------|
| Empirical formula                      | $\text{C}_{36}\text{H}_{18}\text{Nd}_2\text{N}_6\text{O}_{14}$ | $\text{C}_{47.25}\text{H}_{44.25}\text{Nd}_2\text{N}_{9.75}\text{O}_{16.75}$ |
| Formula weight ( $\text{g mol}^{-1}$ ) | 1067.08                                                        | 1305.15                                                                      |
| Crystal system                         | Monoclinic                                                     | Monoclinic                                                                   |
| T/K                                    | 173                                                            | 143                                                                          |
| Space group                            | $P2_1/c$                                                       | $P2_1/c$                                                                     |
| a/Å                                    | 26.3857(12)                                                    | 27.4090(3)                                                                   |
| b/Å                                    | 14.0955(7)                                                     | 11.1853(2)                                                                   |
| c/Å                                    | 16.9025(8)                                                     | 16.97965(19)                                                                 |
| $\alpha/^\circ$                        | 90                                                             | 90                                                                           |
| $\beta/^\circ$                         | 98.528 (2)                                                     | 98.5206(12)                                                                  |
| $\gamma/^\circ$                        | 90                                                             | 90                                                                           |

|                                          |                       |                       |
|------------------------------------------|-----------------------|-----------------------|
| Volume/Å <sup>3</sup>                    | 6216.878 (5)          | 5148.13 (13)          |
| Z                                        | 4                     | 4                     |
| Calculated density (g/cm <sup>3</sup> )  | 1.136                 | 1.684                 |
| F(000)                                   | 2080                  | 2600                  |
| μ, mm <sup>-1</sup>                      | 1.701                 | 15.91                 |
| Crystal size/mm <sup>3</sup>             | 0.090 x 0.120 x 0.120 | 0.196 x 0.084 x 0.029 |
| Radiation                                | 0.71073               | 1.54184               |
| 2θ max                                   | 60.90°                | 75.7°                 |
| Goodness of fit S                        | 1.15                  | 1.03                  |
| Final R indexes [I>=2σ (I)]              | 0.0737 (15969)        | 0.0541(8615)          |
| Final wR <sub>2</sub> indexes [all data] | 0.1648 (19050)        | 0.1417(10133)         |
| Highest peak                             | 5.14                  | 3.46                  |
| Deepest hole                             | -2.84                 | -1.93                 |

---

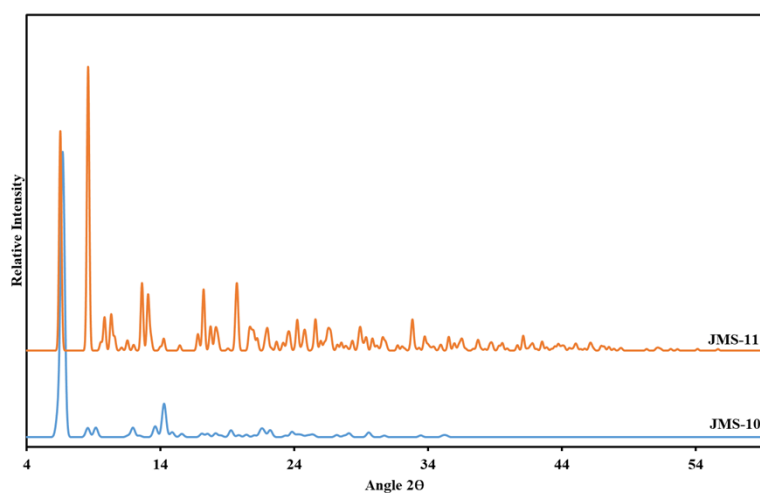

Figure S1: A comparison of the simulated patterns of JMS-10 and JMS-11

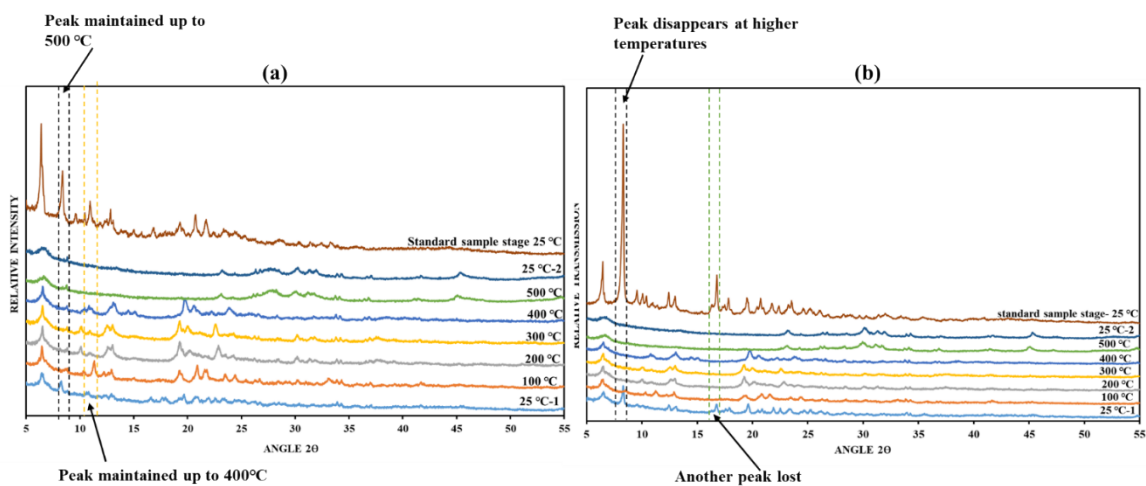

**Figure S2:** Variable temperature PXRD for (a) JMS-10 and (b) JMS-11, comparing the plots of the samples ran in the VT chamber with a sample ran at the standard sample stage.

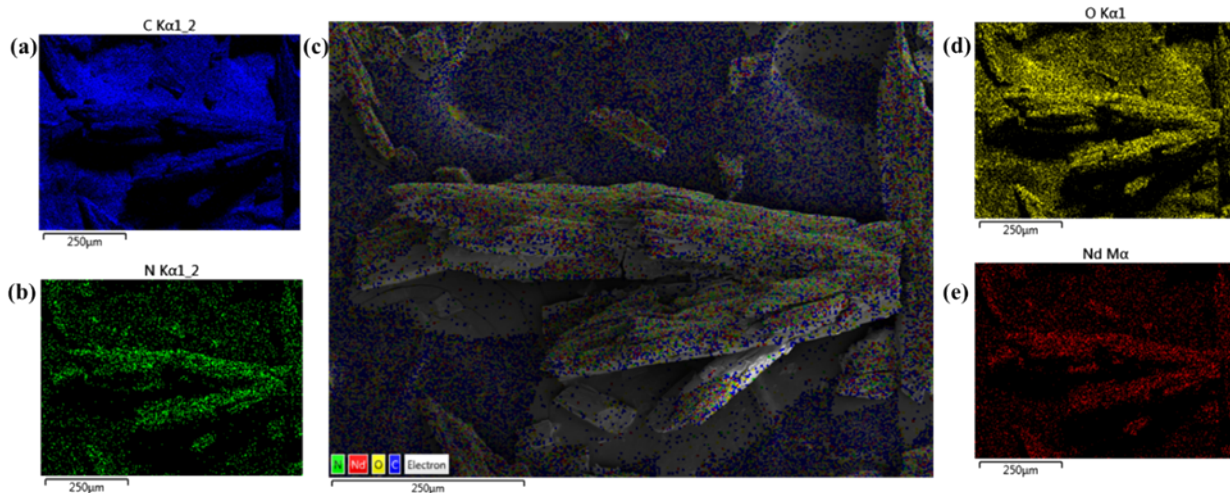

**Figure S3:** Elementary mapping of JMS-10 crystal as obtained from SEM-EDX



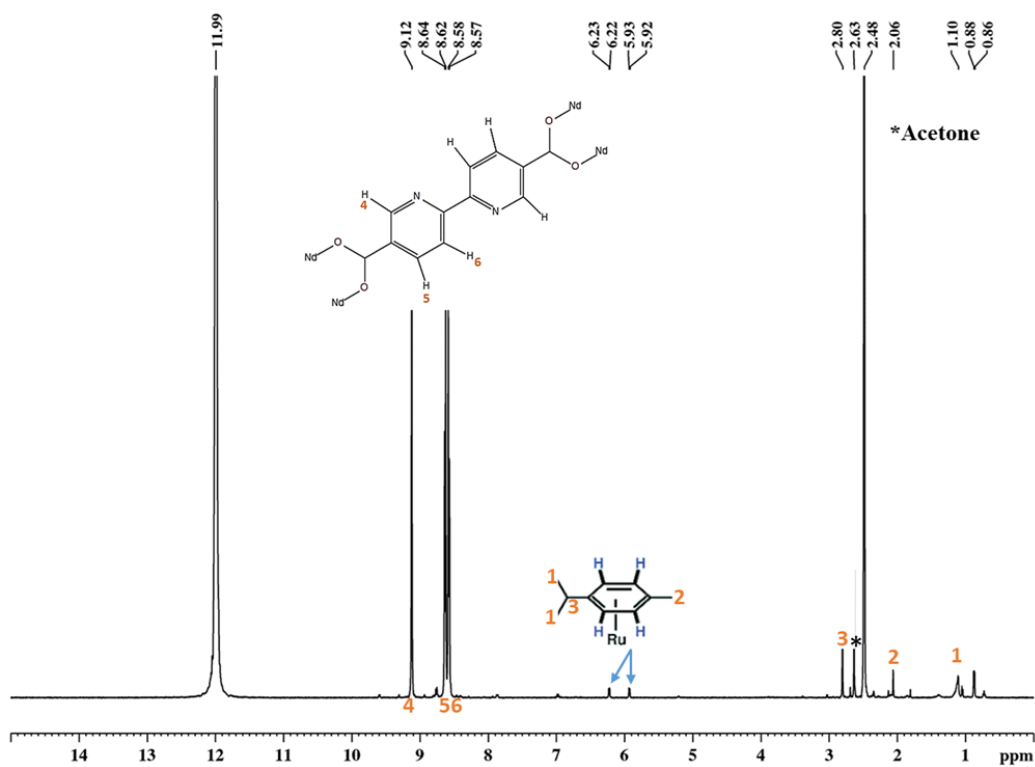

**Figure S5:** Proton NMR for Ru(II)@JMS-10

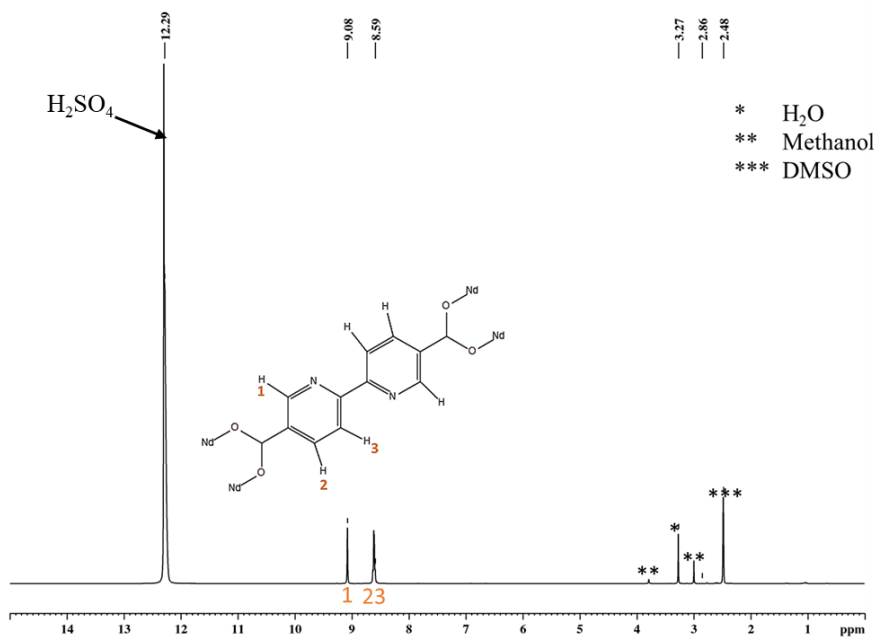

**Figure S6:** Proton NMR for JMS-10

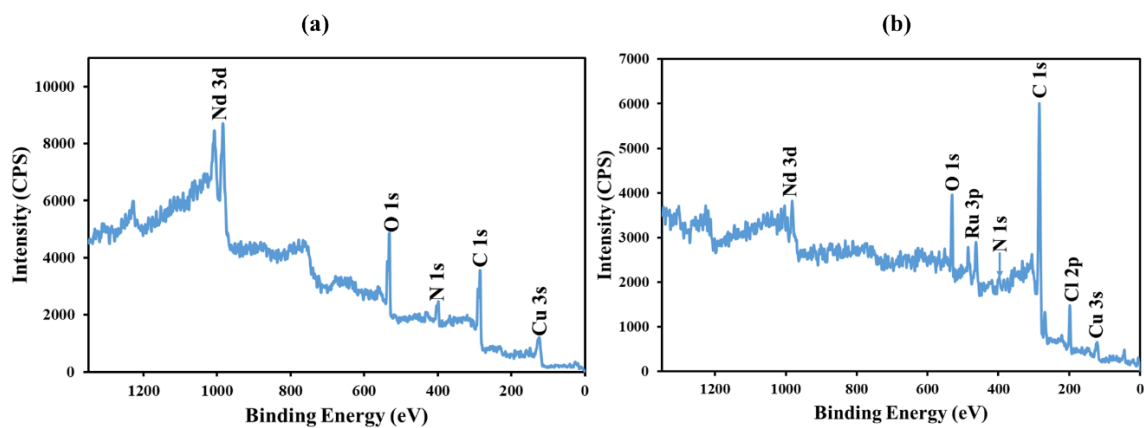

**Figure S7:** XPS of (a) JMS-10 and (b) Ru(II)@JMS-10

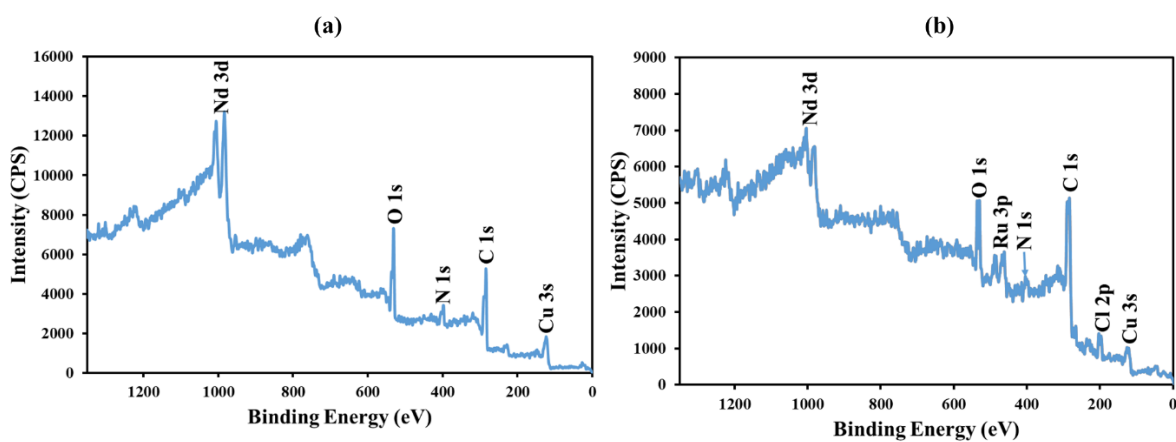

**Figure S8:** XPS of (a) JMS-11 and (b) Ru(II)@JMS-11

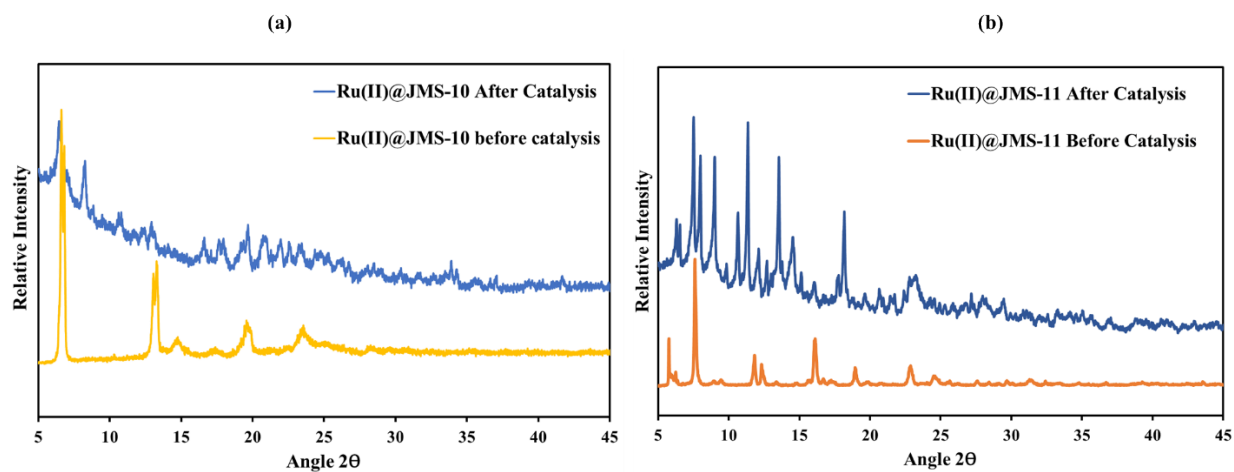

**Figure S9:** PXRD plots for the and Ru functionalised JMS-10 and JMS-11 before and after catalysis

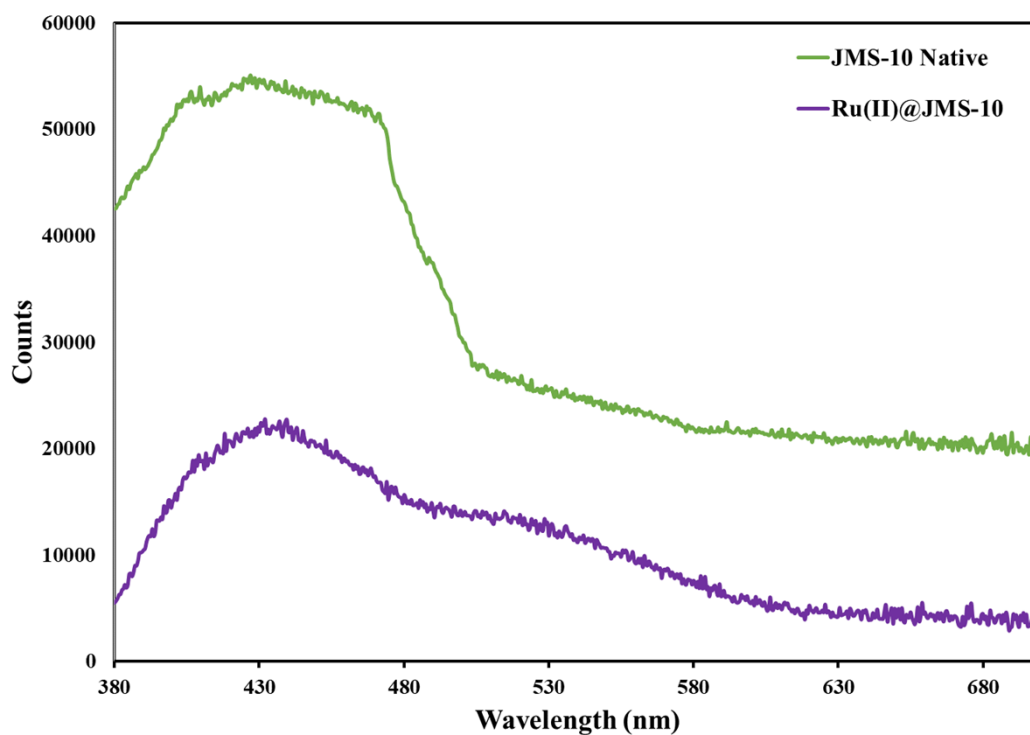

**Figure S10:** Photoluminescence results for JMS-10 and its functionalised form.



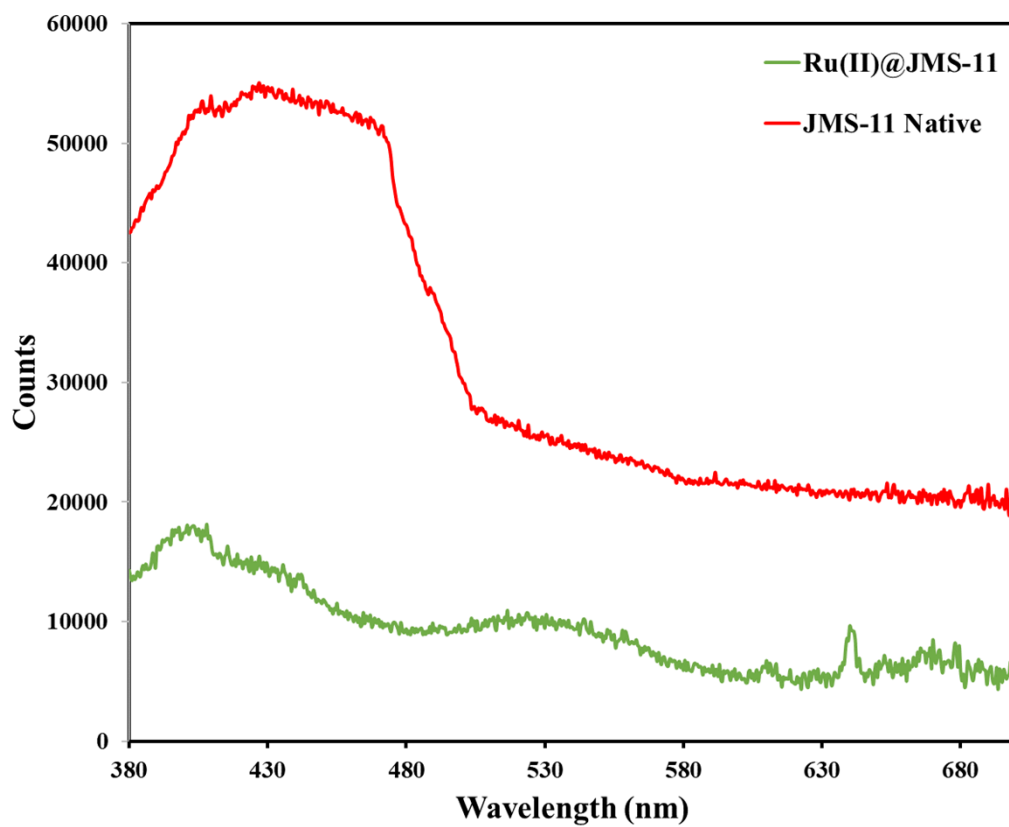

**Figure S11:** Photoluminescence of JMS-11 and its functionalised form.
